# Supplementary material for: Highly conjugated poly(N-heteroacene) nanofibers for reversible Na storage with ultra-high capacity and a long cycle life
Source: Royal Society of Chemistry journal article supplement (doi:10.1039/c8ta06724d), 2018-01-01
Supplement: c8ta06724d1.pdf [file c8ta06724d1.pdf]

## Supporting Information

### Highly Conjugated Poly(N-heteroacene) Nanofibers for Reversible Na storage with Ultra-High-capacity and Long cycle life

Tiantian Gu<sup>a,b</sup>, Min Zhou<sup>a\*</sup>, Bing Huang<sup>c</sup>, Mengyun Liu<sup>b</sup>, Xiaolin Xiong<sup>b</sup>, Kangli Wang<sup>a</sup>, Shijie Cheng<sup>a</sup>, Kai Jiang<sup>ab</sup>

*a. State Key Laboratory of Advanced Electromagnetic Engineering and Technology School of Electrical and Electronic Engineering, Huazhong University of Science and Technology, Wuhan, Hubei 430074, China.*

*b. State Key Laboratory of Materials Processing, and Die & Mould Technology, School of Materials Science and Engineering, Huazhong University of Science and Technology, Wuhan, Hubei 430074, China.*

*c. Institute of Physical Chemistry and National Center for Computational Design and Discovery of Novel Materials (MARVEL), Department of Chemistry, University of Basel, Klingelbergstrasse 80, 4056 Basel, Switzerland.*

\*Corresponding author: [kjiang@hust.edu.cn](mailto:kjiang@hust.edu.cn), [minzhou0729@hust.edu.cn](mailto:minzhou0729@hust.edu.cn)

#### 1. XRD patterns of the pristine PAN and PAN thermal treated at different temperatures for 6

h

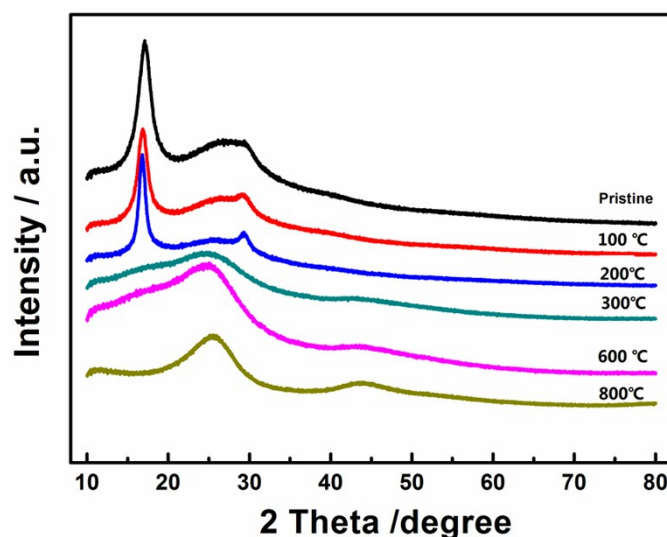

**Figure S1.** XRD patterns of the pristine PAN and PAN thermal treated at different temperatures (100°C - 800°C)

The products of PAN treated at different temperatures (100~800°C) are investigated by X-ray diffraction (XRD). For the pristine PAN, the typical sharp peaks at 16.88° and 29.38° can be ascribed

to (100) and (010) diffraction, while the peak at 25.88 is speculated to the diffraction of amorphous molecular chain. When temperature increases to 300°C, the peaks at 25.88° and 29.38° disappear. When further increasing to 800 °C, the peak at 16.88 disappears. Two sharp peaks at 25.18 and 43.68 assigned to (002) and (10) diffraction of pseudo-graphite appear, implying the deposition of the organic polymer structure and carbonization.

## 2. Raman spectrum

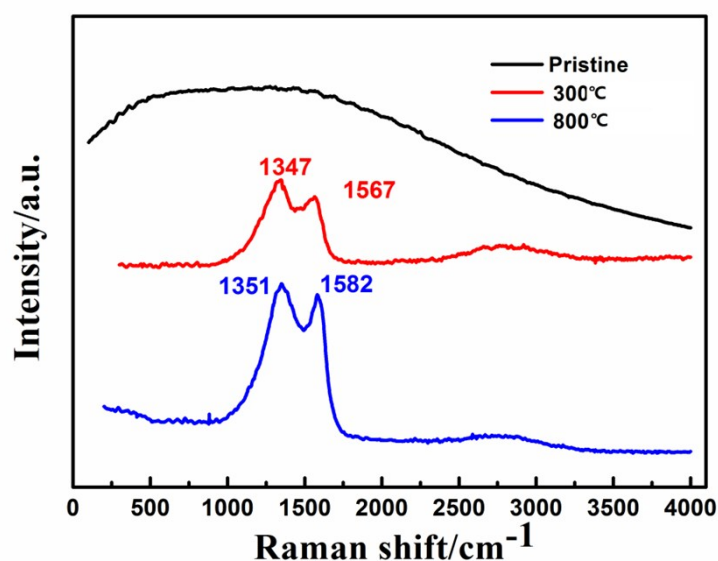

**Figure S2.** Raman spectrum of the pristine PAN and PAN treated at 300 °C and 800 °C

The pristine PAN shows a strong fluorescence in Raman spectrum. When treated at 300 °C, two bands centered at 1347 cm<sup>-1</sup> and 1567 cm<sup>-1</sup> corresponding to the D and G-band. In general, the D band is attributed to defects and disorder in the hexagonal graphitic layers, while the G band is ascribed to the vibration of sp<sup>2</sup> carbon atoms in a 2D hexagonal lattice. As the temperature increase to 800 °C, the I<sub>D</sub>/I<sub>G</sub> value decreases from 1.14 to 1.06, indicating higher orientation and higher graphitic order.

## 3. FT-IR spectrum of the pristine PAN and PAN thermal treated at different temperatures

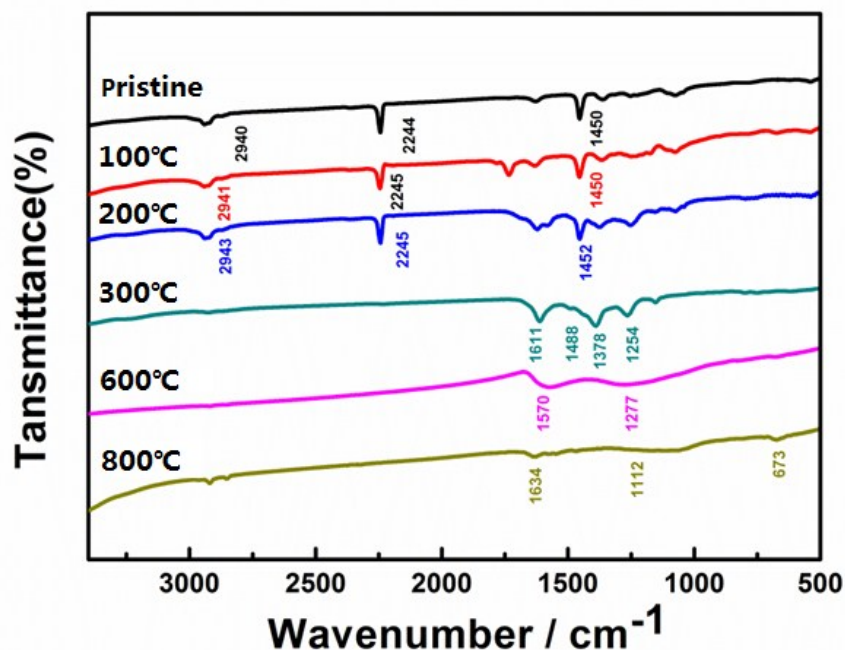

**Figure S3.** FT-IR spectrum of the pristine PAN and PAN thermal treated at different temperatures (100°C - 800°C)

For the pristine PAN, the single peak at 2240  $\text{cm}^{-1}$  should be ascribed to the typical absorption of  $\text{C}\equiv\text{N}$  groups. For the sample treated at 300°C, the  $\text{C}\equiv\text{N}$  bands disappear and the broad absorption band around 1611  $\text{cm}^{-1}$  should be ascribed to the absorption of mixed double bonds [ $\text{C}=\text{C}$  and  $\text{C}=\text{N}$ ], implying the cyclization of cyano-group ( $\text{C}\equiv\text{N}$ ) and generation of heterocyclic ring ( $\text{C}=\text{N}$  and  $\text{C}=\text{C}$  groups). As the temperature gets higher, the poly(heteroacene) structure transform to N-doped carbon fibers.

4. FT-IR spectrum of the polyacene (PAC) and cPAN.

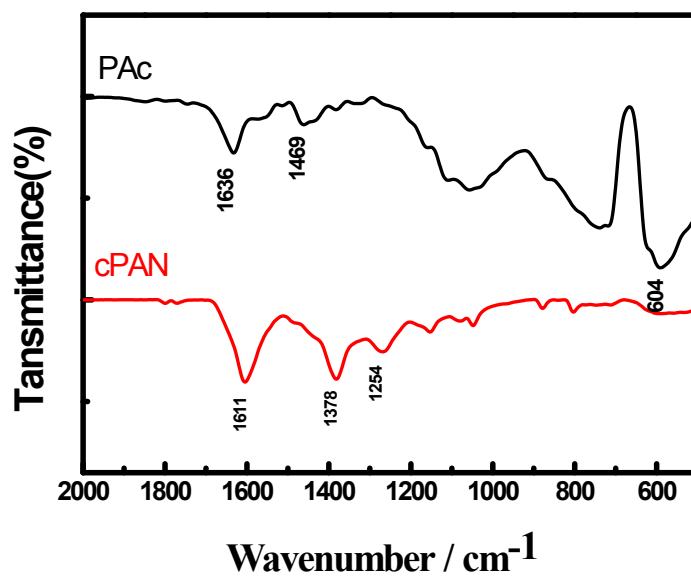

Figure S4. FT-IR spectrum of the PAC and cPAN

For the polyacene, the peaks in the region of 1400 - 1600cm<sup>-1</sup> are corresponding to the conjugated vibration, and the peak at 604 cm<sup>-1</sup> belongs to the aromatic ring.

## 5. Thermogravimetric analysis (TGA)

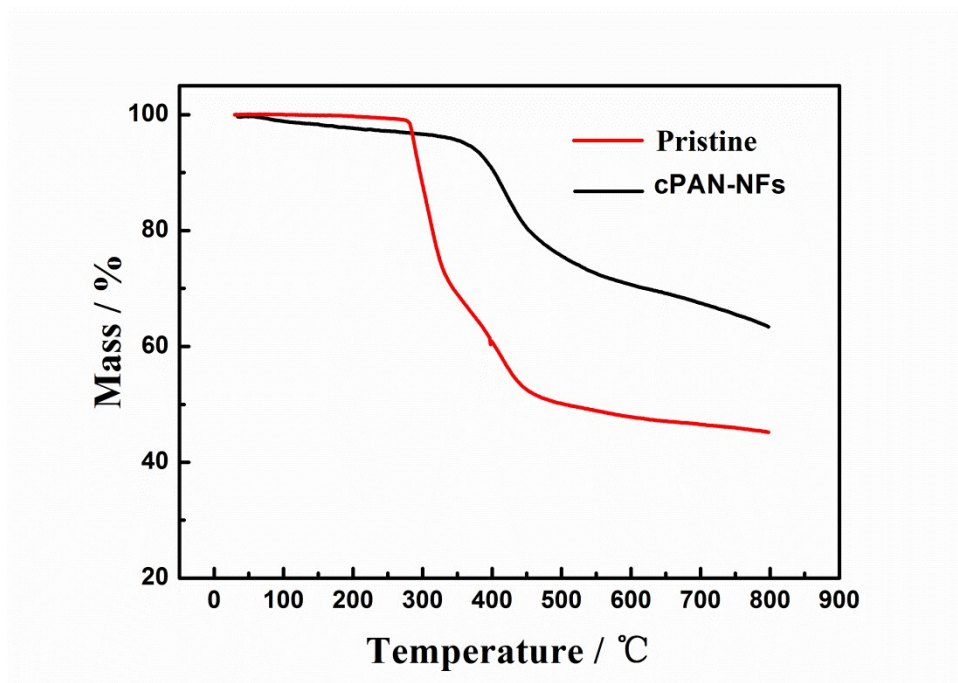

**Figure S5.** TG curves of pristine PAN and as-prepared cPAN-NFs

The TG curve of pristine PAN exhibits two main stages of weight loss. The first occur in the temperature range of 250–300°C, which could be ascribed to the cyclization process of PAN with little weight loss. The great weight loss of pristine PAN in the temperature range of 280–450°C, which corresponds to the carbonization with the emission of H, C, N and oligomers. <sup>[1]</sup>

## 6. $^{13}\text{C}$ solid-state NMR spectrum

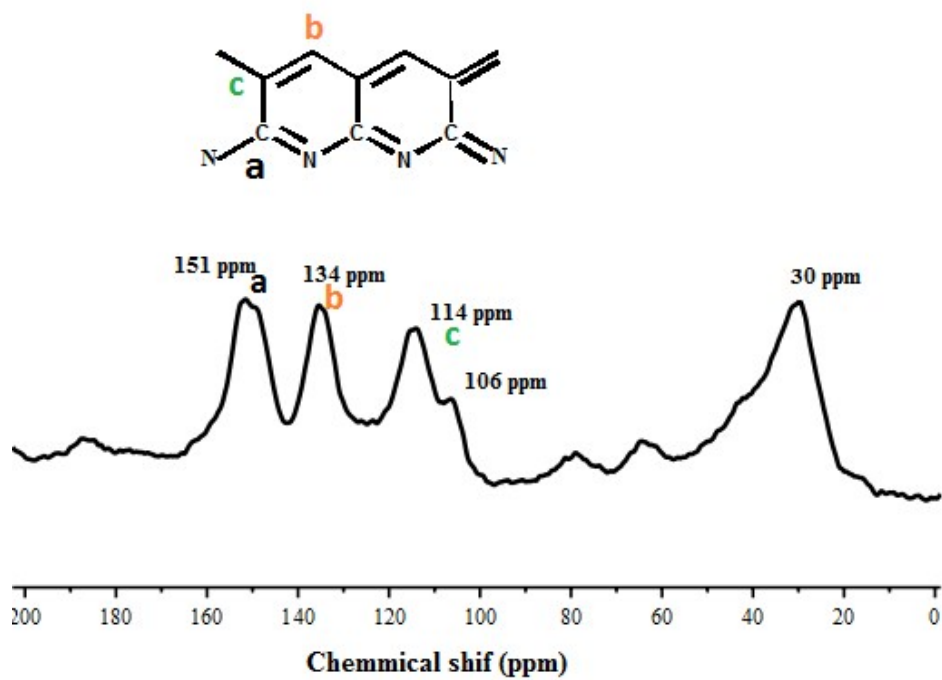

**Figure S6.** The  $^{13}\text{C}$  solid state DP/MAS NMR spectra of cPAN-NFs

## 7. XPS characterization of cPAN

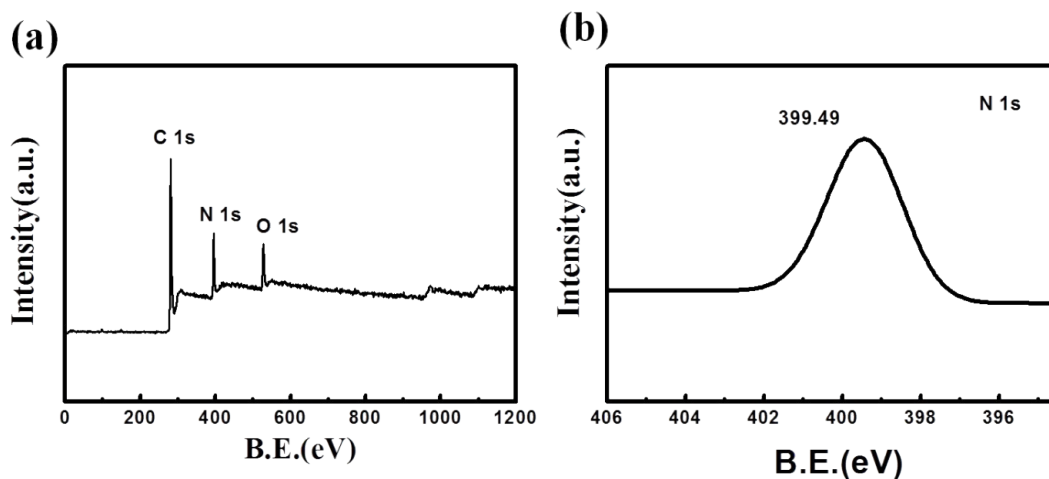

**Figure S7.** (a) X-ray photoelectron spectra of the as-prepared cPAN, (b) high resolution image of N1s bands

The binding energy for N 1s electrons appeared at 399.49 eV which is attributed to the aromatic nitrogen, indicating that the nitrogen incorporation into the polyacene backbone.

## 8. Elemental composition of the pristine PAN, as-prepared cPAN-NFs

**Table S1.** Elemental composition information of pristine PAN and cPAN-NFs

| Sample              | C(wt%) | N(wt%) | H(wt%) |
|---------------------|--------|--------|--------|
| <b>Pristine PAN</b> | 67.92  | 26.42  | 5.660  |
| cPAN-NFs            | 65.67  | 22.23  | 4.462  |



9. The morphology characteristics of the as-prepared PAc, cPAN-PANs and bulk cPAN

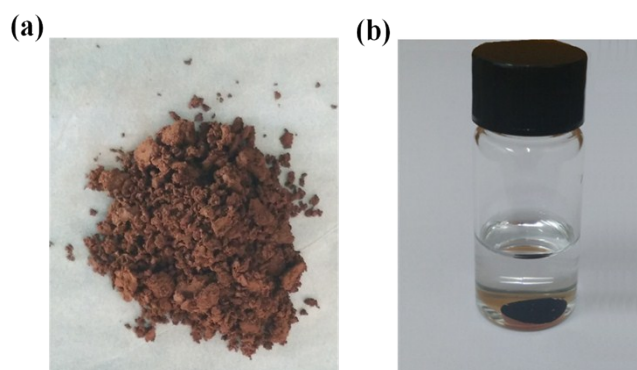

**Figure S8.** Digital image of (a) cPAN-NFs powders (b) cPAN-NFs electrode steeped in NaPF<sub>6</sub>/DME after 36 h

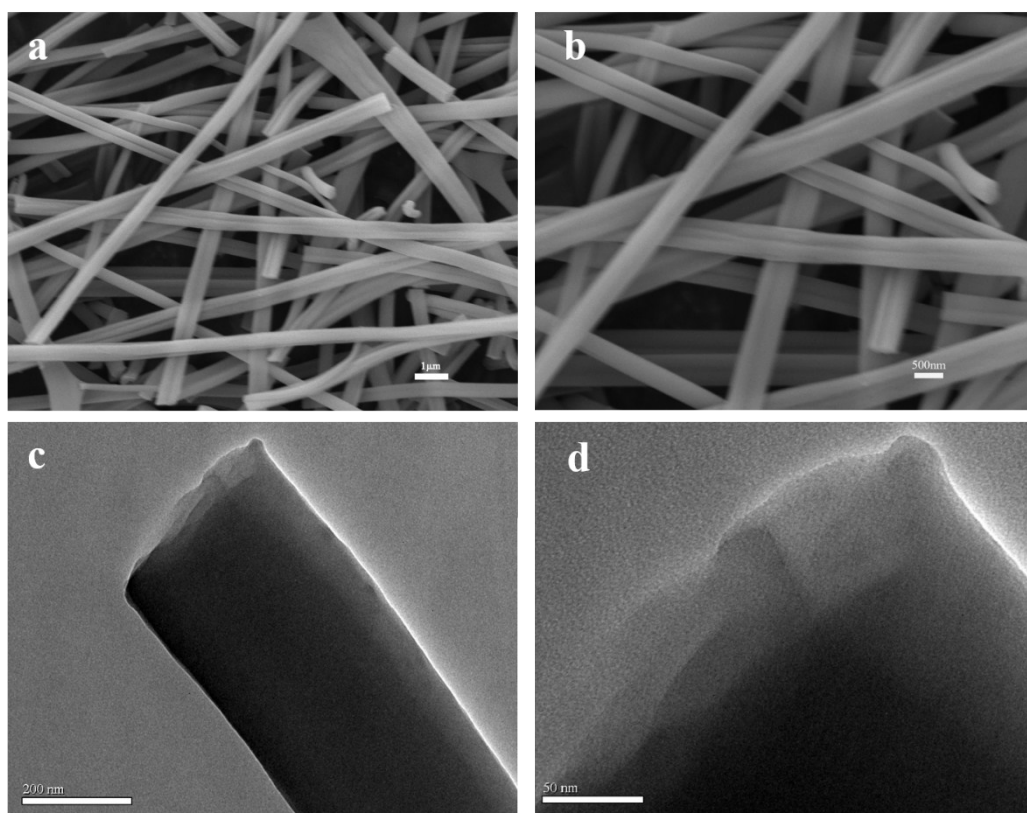

**Figure S9.** SEM image of the as-prepared cPAN-NFs (a) and (b); TEM image of the as-prepared cPAN-NFs (c) and (d).

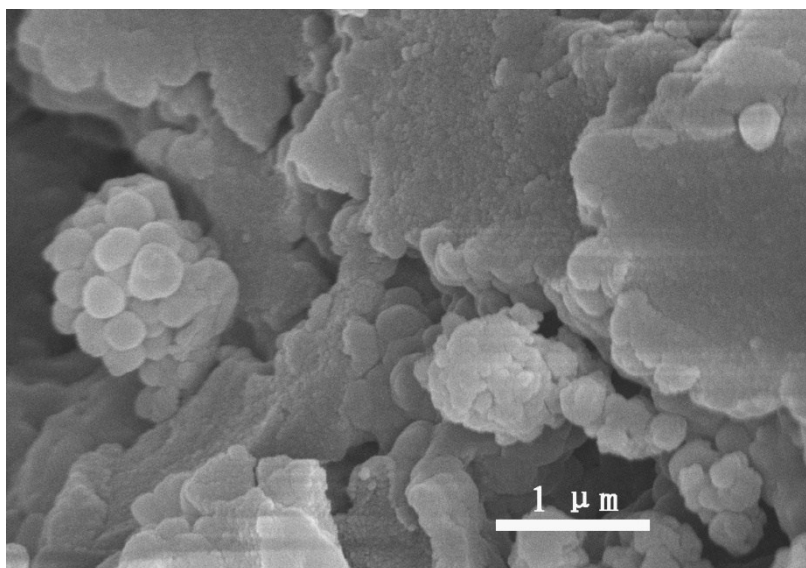

**Figure S10.** SEM image of the bulk cPAN

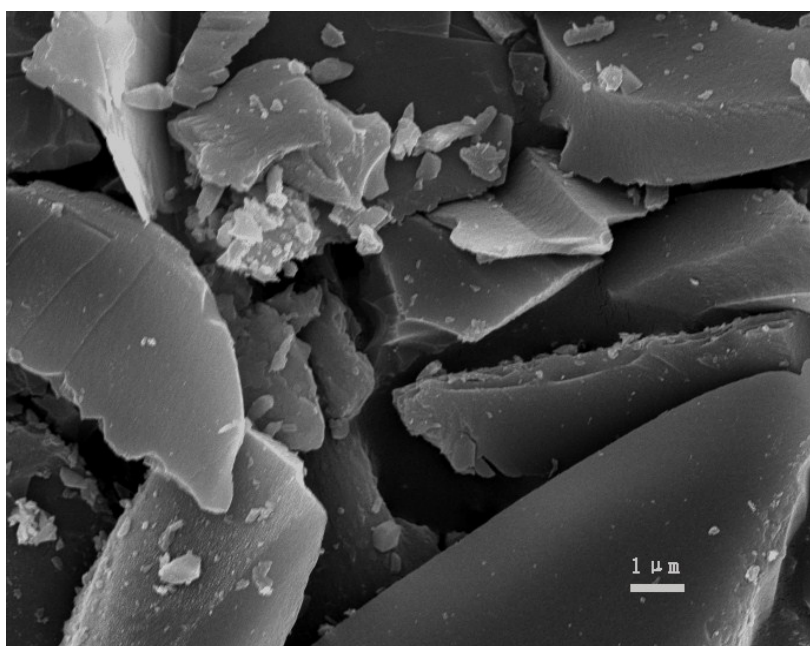

**Figure S11.** SEM image of the polyacene

For comparison, polyacene (PAC) show a flake-like architecture with particle size of ~10 μm.

## 10. Nitrogen adsorption/desorption isotherms of the as-prepared cPAN-NFs

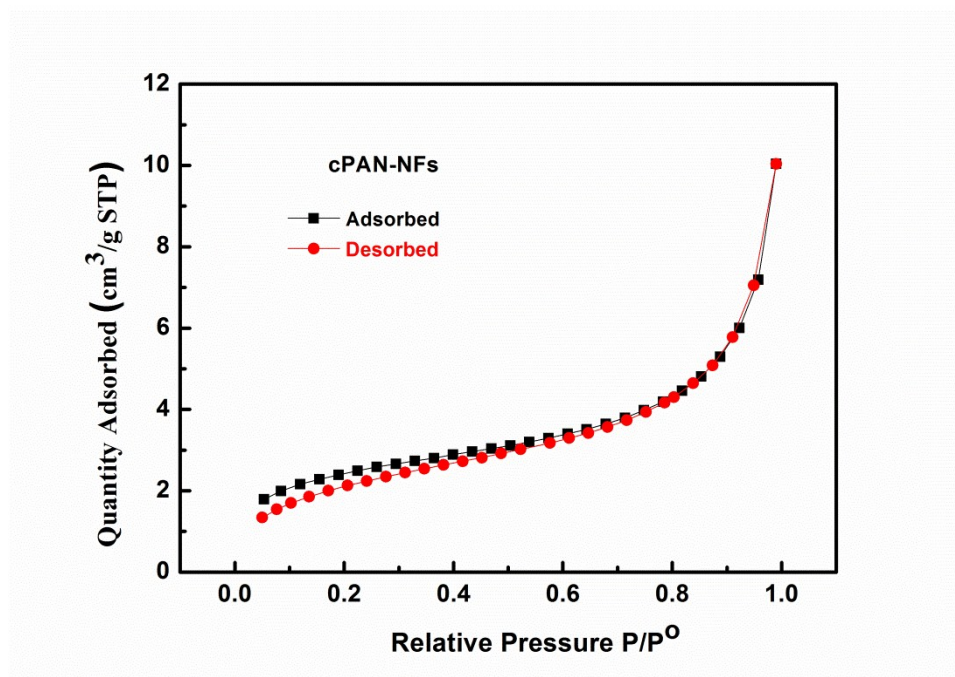

**Figure S12.** Nitrogen adsorption/desorption isotherms of as-prepared cPAN-NFs

## 11. The electronic structure of cPAN and other conventional conducting polymers (Pac, PANI, PPy, PTh)

**Table S2.** Elemental composition information of PAN and cPAN-NFs

| Polymer                                   | cPAN        | PAc         | PANI        | PPy         | PTh         |
|-------------------------------------------|-------------|-------------|-------------|-------------|-------------|
| <b>HOMO(eV)</b>                           | -5.44       | -4.08       | -3.96       | -4.04       | -4.66       |
| <b>LUMO (eV)</b>                          | -4.65       | -3.02       | -0.23       | -0.85       | -2.93       |
| <b>E<sub>g</sub>(eV)</b> (HOMO-LUMO gaps) | <b>0.79</b> | <b>1.06</b> | <b>3.73</b> | <b>3.19</b> | <b>1.73</b> |

## 12. Charge-discharge profiles of the PAN treated at 300 °C for different time.

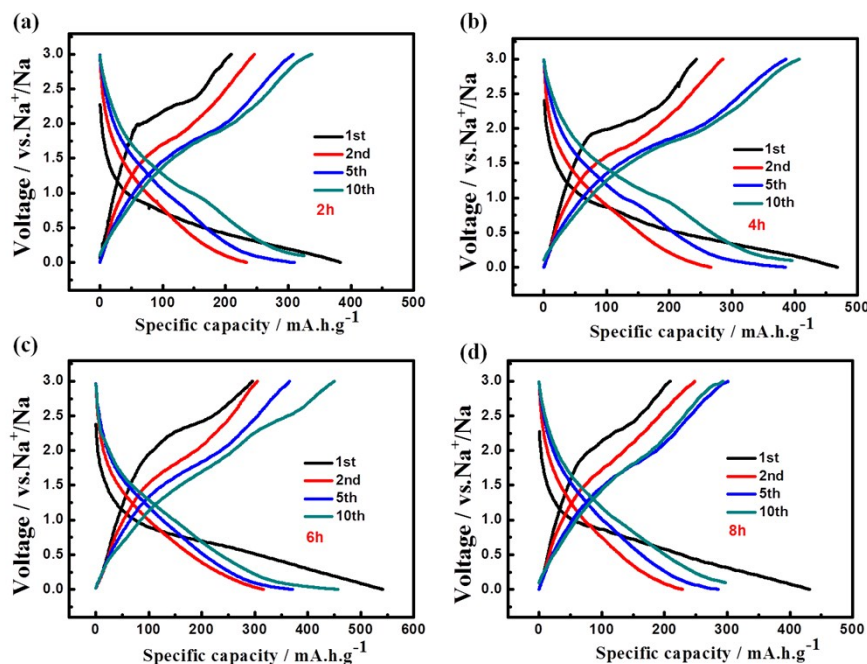

**Figure S13.** Charge-discharge profiles of cPAN-NFs electrode thermal treated at 300 °C for (a) 2 h; (b) 4 h; (c) 6 h; (d) 8 h in NaPF<sub>6</sub>/DME in the voltage range of from 0.001 to 3 V. Current density: 50 mA g<sup>-1</sup>

To evaluate the effect of thermal treating time on the electrochemical performances of cPAN-NFs, the Na-storage performance of the cPAN-NF thermal treated at 300 °C for various periods of time is measured. As shown in Figure S14, the cPAN-NFs electrode deliver reversible capacities of 320, 400, 450 and 300 mA h g<sup>-1</sup> for the samples treated for 2, 4, 6, 8 h, respectively.

The cPAN-NFs samples treated for 6 h exhibit the best Na-storage performances due to the well-formed pseudo-graphite microstructure. Extending the heating time is beneficial to generate conjugated planes with high conjugated extent and large size of pseudo-graphite crystal [2-6].

### 13. Electrochemical performances of the carbon additive (KB and MWCNT)

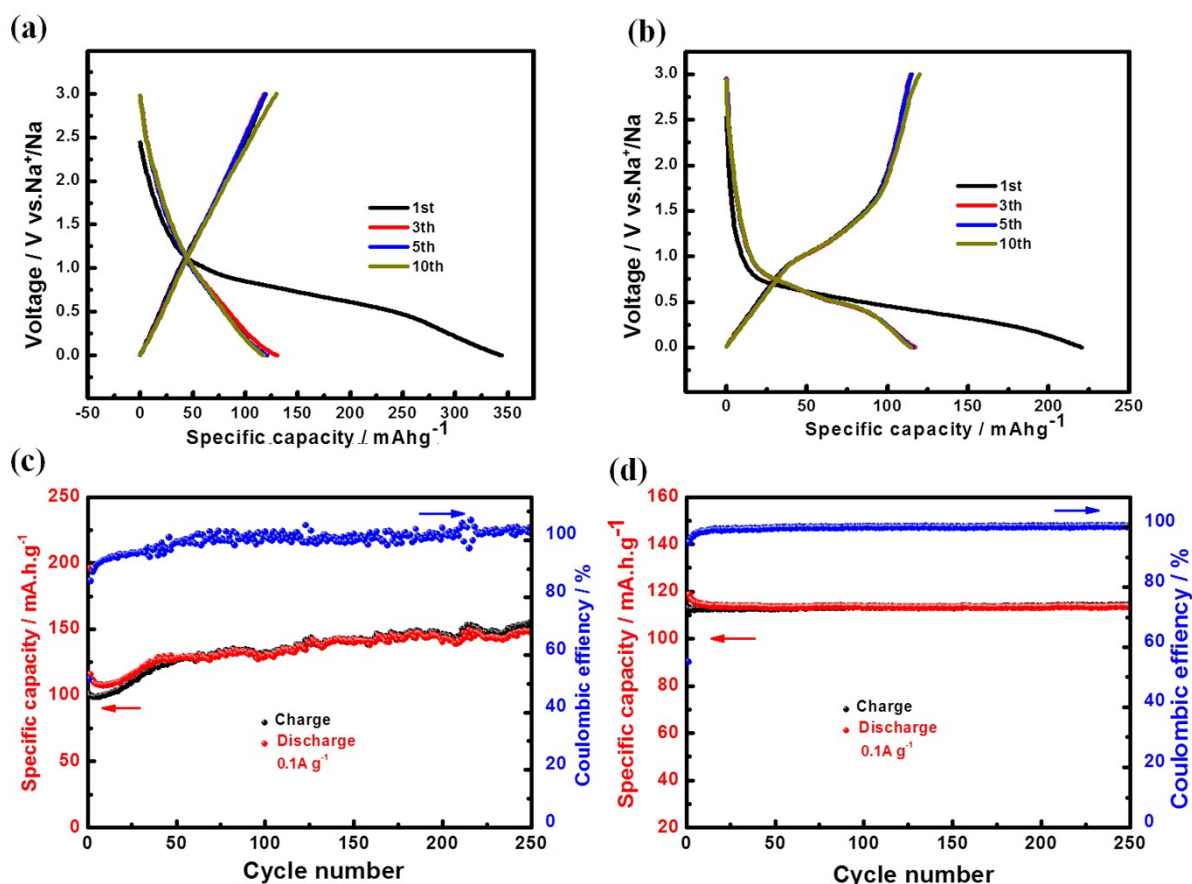

**Figure S14.** The charge-discharge profiles of Ketchen black (a) and MWCNT (b) at 0.05 A g<sup>-1</sup>; Cycling performance of Ketchen black (c) and MWCNT (d) in 1.0 mol L<sup>-1</sup> NaPF<sub>6</sub>/DME at 0.1 A g<sup>-1</sup>.

As shown in Figure S15, the carbon additive KB and MWCNT can deliver a reversible capacity of 130, 115 mA h g<sup>-1</sup>, respectively. As the weight ratio of cPAN/KB/MWCNT = 6/2/1, the capacities contribution of KB and MWCNT are 26 and 11.5 mA h g<sup>-1</sup>, which are negligible compared to the high capacity of cPAN (527 mA h g<sup>-1</sup>).



#### 14. Na storage performances of the bulk cPAN electrode

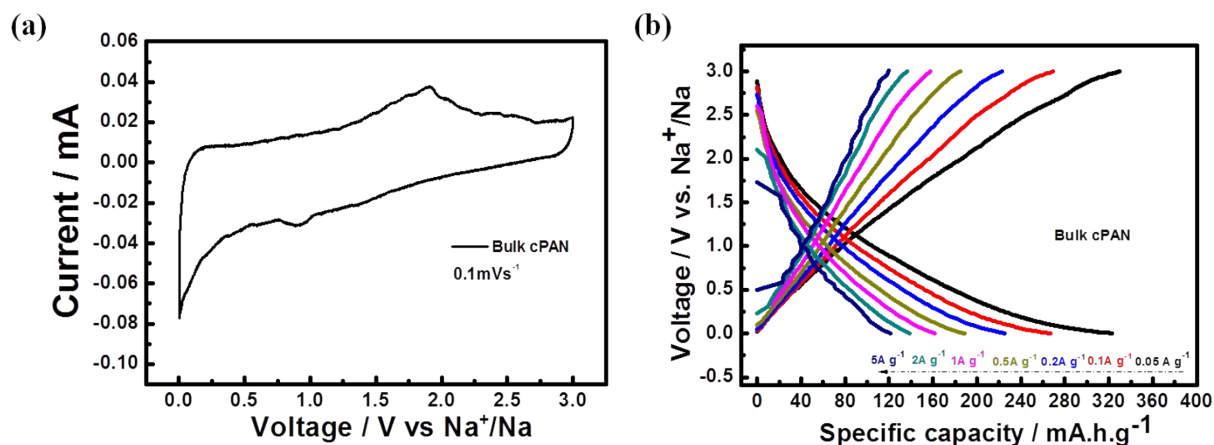

**Figure S15.** Na storage performance of the bulk cPAN electrode in NaPF<sub>6</sub>/DME in the voltage range of from 0.001 to 3 V: (a) Cyclic voltammetry curves scanned at a rate of 0.1 mVs<sup>-1</sup> (b) charge-discharge profiles at different current densities.

#### 15. Capacity retention and charge-discharge profiles of cPAN-NFs at 5Ag<sup>-1</sup>

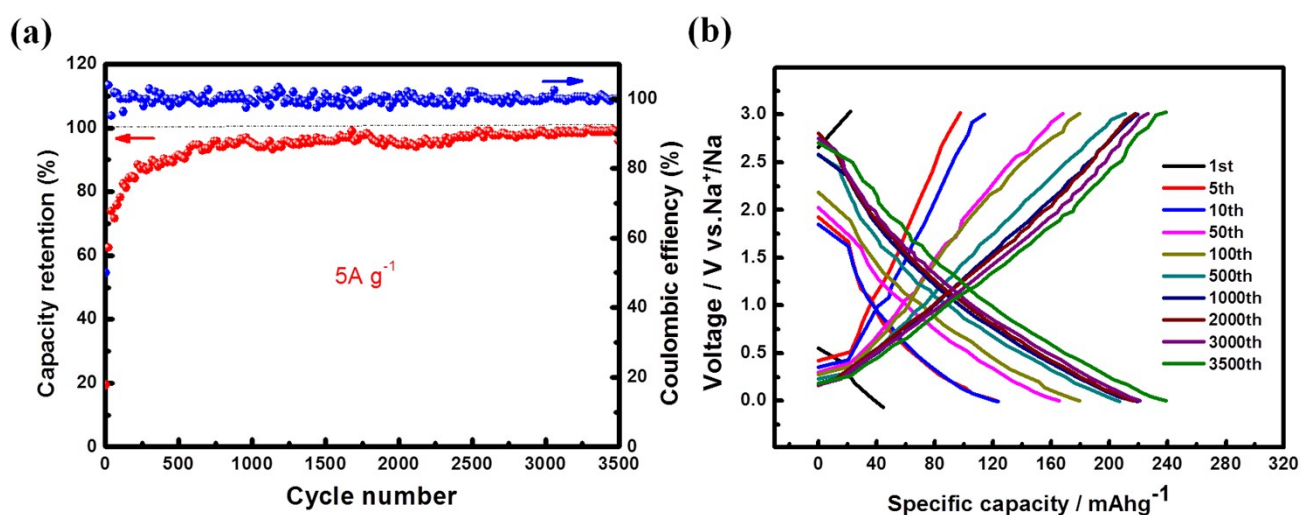

**Figure S16.** Capacity retention (a) and charge-discharge profiles (b) of cPAN-NFs at 5Ag<sup>-1</sup>.

As shown in Fig 3c and FigS19 a, the discharge and charge capacities of the PAN-NFs in the first cycle are 44.4 and 22.2 mA h g<sup>-1</sup>, corresponding to an initial columbic efficiency of 50%. Then the

capacity increased up to  $200 \text{ mA h g}^{-1}$  and came to be stable. After 3500 cycles, a capacity retention of 99.4% could be obtained with stable coulombic efficiency up to 99.9%. As shown in FigS19 b, the charge/discharge curves exhibit no obvious change except for the lower polarization.

**16. Comparison of the Na –storage performances of cPAN-NFs in this study with other Na-storage anode materials previously reported in the literature**

**Table S3.** Comparison of Na storage performances of cPAN-NFs with other organic anode materials

| Anode                                                             | Capacity/Current density                         | Cycle number/capacity retention | Reference |
|-------------------------------------------------------------------|--------------------------------------------------|---------------------------------|-----------|
| cPAN-NFs                                                          | 527 mA h g <sup>-1</sup> /0.1 A g <sup>-1</sup>  | 3500/~100%                      | This work |
|                                                                   | 195.7 mA h g <sup>-1</sup> /5 A g <sup>-1</sup>  |                                 |           |
| Na <sub>2</sub> TP                                                | 295 mA h g <sup>-1</sup> /0.03 A g <sup>-1</sup> | 90/90%                          | [7]       |
|                                                                   | 100 mA h g <sup>-1</sup> /3 A g <sup>-1</sup>    |                                 |           |
| Na <sub>2</sub> bpdC                                              | 200 mA h g <sup>-1</sup> /0.04A g <sup>-1</sup>  | 150/90%                         | [8]       |
|                                                                   | 100 mA h g <sup>-1</sup> /3.74 A g <sup>-1</sup> |                                 |           |
| Na <sub>2</sub> C <sub>6</sub> H <sub>2</sub> O <sub>4</sub> /CNT | 259 mA h g <sup>-1</sup> /0.029A g <sup>-1</sup> | 30/92%                          | [9]       |
|                                                                   | 142 mA h g <sup>-1</sup> /2.03 A g <sup>-1</sup> |                                 |           |
| Juglone/RGO                                                       | 280 mA h g <sup>-1</sup> /0.1 A g <sup>-1</sup>  | 100/91.8%                       | [10]      |
|                                                                   | 210 mA h g <sup>-1</sup> /0.4A g <sup>-1</sup>   |                                 |           |
| SSDC                                                              | 222 mA h g <sup>-1</sup> /0.05 A g <sup>-1</sup> | 400/70%                         | [11]      |
|                                                                   | 72mA h g <sup>-1</sup> / 10A g <sup>-1</sup>     |                                 |           |
| O-PDA-2                                                           | 508 mA h g <sup>-1</sup> /0.05A g <sup>-1</sup>  | 1024/~ 100%                     | [12]      |
|                                                                   | 122 mA h g <sup>-1</sup> /3.2A g <sup>-1</sup>   |                                 |           |
| Na <sub>2</sub> NC/G                                              | 207 mA h g <sup>-1</sup> /0.02Ag <sup>-1</sup>   | 100/92%                         | [13]      |
|                                                                   | 88 mA h g <sup>-1</sup> /2 A g <sup>-1</sup>     |                                 |           |
| Na <sub>2</sub> PDC                                               | 270 mA h g <sup>-1</sup> /0.015Ag <sup>-1</sup>  | 100/83%                         | [14]      |
|                                                                   | 135 mA h g <sup>-1</sup> /1.57Ag <sup>-1</sup>   |                                 |           |



**Table S4.** Comparison of Na storage performances of cPAN-NFs with other carbon-based materials

| Anode     | Capacity/Current density                          | Cycle number/capacity retention | Reference |
|-----------|---------------------------------------------------|---------------------------------|-----------|
| cPAN-NFs  | 527 mA h g <sup>-1</sup> /0.05 A g <sup>-1</sup>  | 3500/~100%                      | This work |
|           | 195.7 mA h g <sup>-1</sup> /5 A g <sup>-1</sup>   |                                 |           |
| DC-S      | 561 mA h g <sup>-1</sup> /0.02 A g <sup>-1</sup>  | 1000/85.9%                      | [15]      |
|           | 275 mA h g <sup>-1</sup> /1 A g <sup>-1</sup>     |                                 |           |
| 3D PCFs   | 356.1 mA h g <sup>-1</sup> /0.1A g <sup>-1</sup>  | 5000/80%                        | [16]      |
|           | 187.6 mA h g <sup>-1</sup> /2.5 A g <sup>-1</sup> |                                 |           |
| 3D OC-500 | 483 mA h g <sup>-1</sup> /0.1Ag <sup>-1</sup>     | 1200/81.4%                      | [17]      |
|           | 299 mA h g <sup>-1</sup> /1 A g <sup>-1</sup>     |                                 |           |
| BN-CNFs   | 691 mA h g <sup>-1</sup> /0.1A g <sup>-1</sup>    | 1000/84.1%                      | [18]      |
|           | 314 mA h g <sup>-1</sup> /10A g <sup>-1</sup>     |                                 |           |
| P-CNSs    | 321 mA h g <sup>-1</sup> /0.1A g <sup>-1</sup>    | 5000/ nearly 100%               | [19]      |
|           | 149mA h g <sup>-1</sup> /5A g <sup>-1</sup>       |                                 |           |
| G/C       | 432.3 mA h g <sup>-1</sup> /0.1A g <sup>-1</sup>  | 1000/94.691%                    | [20]      |
|           | 330 mA h g <sup>-1</sup> /2A g <sup>-1</sup>      |                                 |           |

17. Structure and morphology changes of pristine electrodes and electrodes cycled after 1700 cycles.

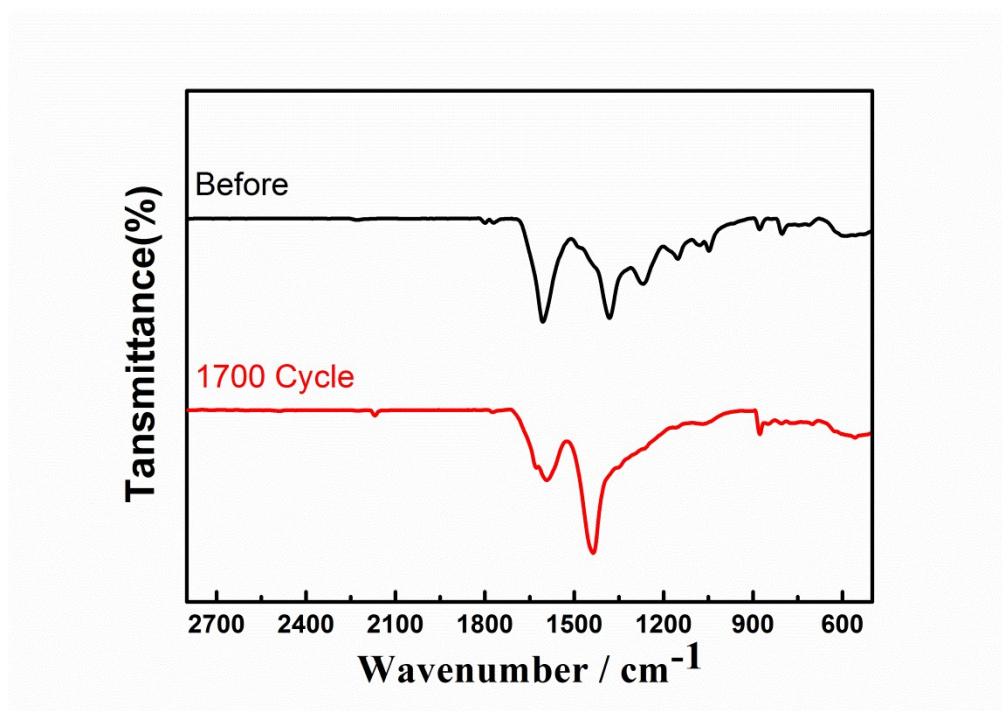

**Figure S17.** FT-IR spectrum of the pristine and cycled electrodes (after 1700 cycles) at 5 A g<sup>-1</sup>

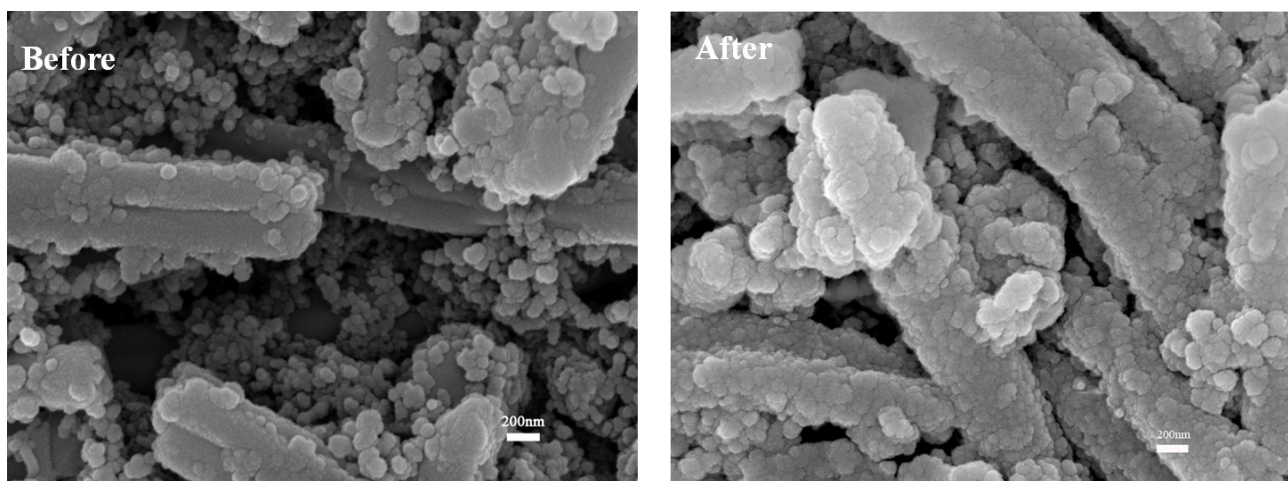

**Figure S18.** SEM images of the pristine and cycled electrodes (after 1700 cycles) at 5 A g<sup>-1</sup>

## 18. Geometries and frontier molecular orbitals.

DFT calculations were done using Gaussian 09 package at the computational level of B3LYP/6-31G(D) with PCM solvation model.

The polymer system is simplified and modeled by oligomer containing 12 units ( $C_3NH$ )

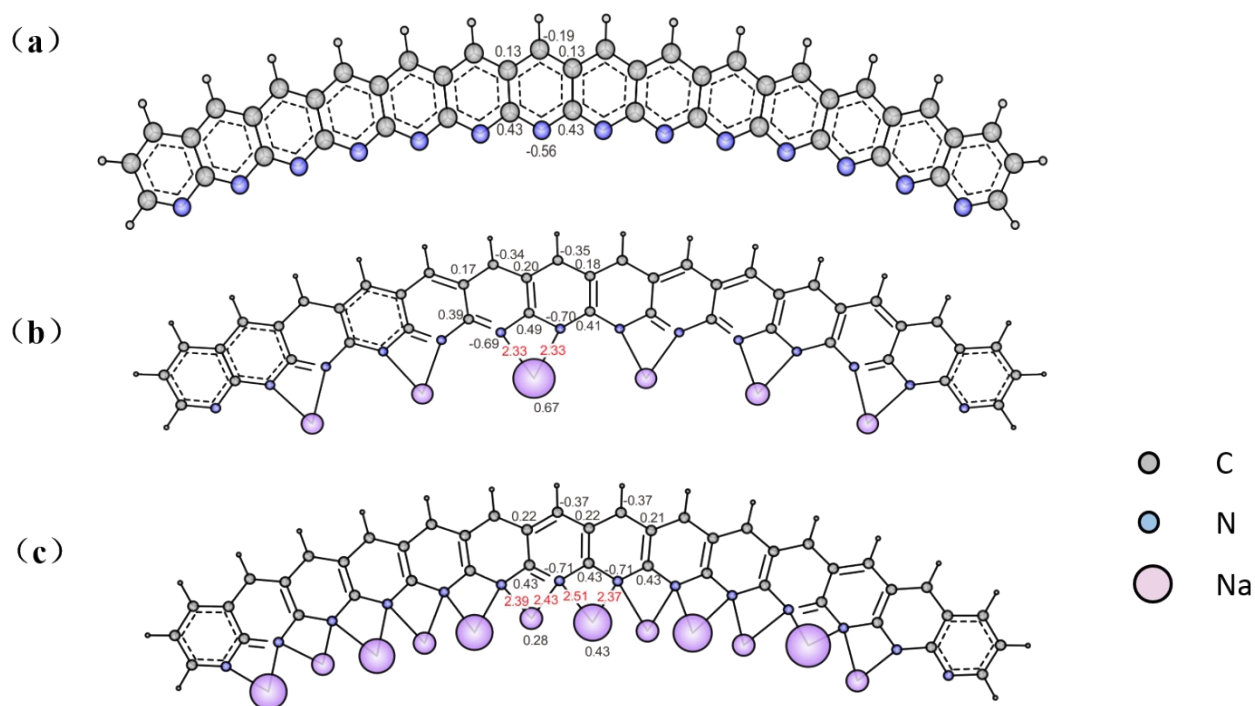

**Figure S19.** Mulliken charge distribution of (a) cPAN; (b) cPAN-50%Na; (c) cPAN-Na.

*Red font: bond distance; Black font: Mulliken charge*

LUMO

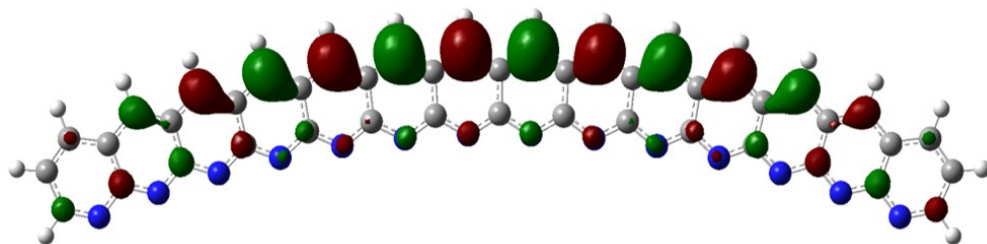

HOMO

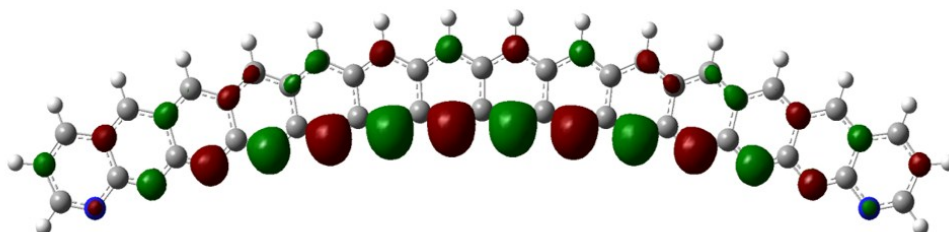

**Figure S20.** Frontier orbital wavefunctions of **cPAN** in Diethylether with isovalue of 0.02.

LUMO

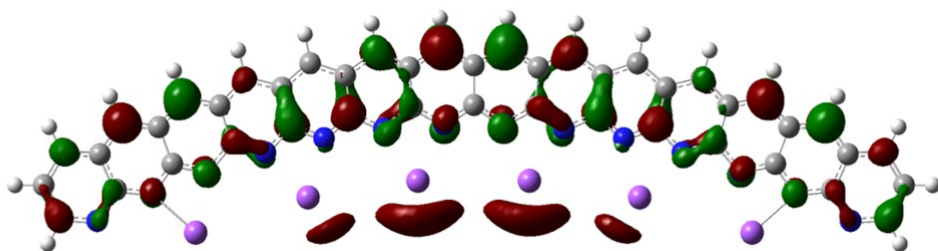

HOMO

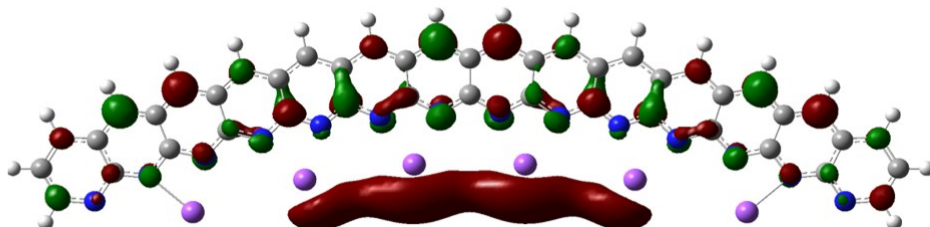

**Figure S21.** Frontier orbital wavefunctions of **cPAN-50%Na** in Diethylether with isovalue of 0.02.

LUMO

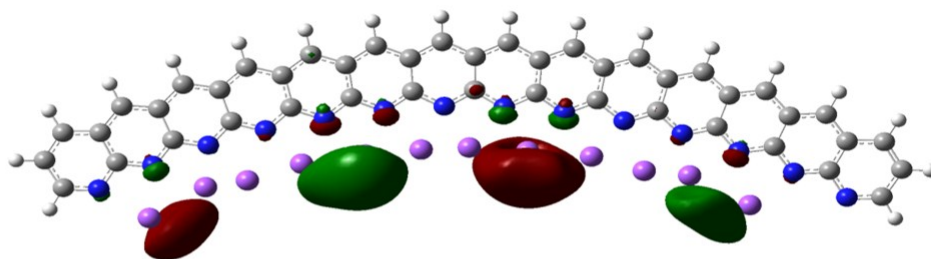

HOMO

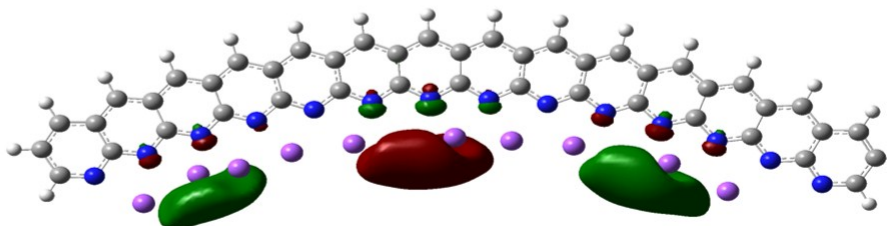

**Figure S22.** Frontier orbital wavefunctions of **cPAN-Na** in Diethylether with isovalue of 0.02.

**Table S5.** Sum of electronic and zero-point energies of the optimized structures **Na**, **cPAN**, **cPAN-50%Na**, **cPAN-Na**

| Energy                                              | Hartree           | eV                |
|-----------------------------------------------------|-------------------|-------------------|
| <b>Na</b>                                           | -162.2862551      |                   |
| <b>cPAN (with 12 units)</b>                         | -2454.0680976     |                   |
| cPAN-50%Na<br>(12 units, 6 Na )                     | -3428.400376      |                   |
| cPAN-Na<br>(12 units, 12 Na )                       | -4402.2399948     |                   |
| $\Delta E_1$ (for the first stage of<br>Na doping)  | <b>-0.1024583</b> | <b>-2.7868667</b> |
| $\Delta E_2$ (for the second stage of<br>Na doping) | <b>-0.0203483</b> | <b>-0.5534747</b> |

The polymer system is simplified and modeled by oligomer containing 12 units of C<sub>3</sub>NH.

At the first stage of Na-doping (from neutral state to a doping level of 50%), 6 Na coordinate with the 12 aromatic nitrogen.

$$\Delta E_1 = [E(\text{cPAN-50\%Na}) - 6 E(\text{Na}) - E(\text{cPAN})]/6$$

At the second stage of Na-doping (from doping level of 50% to fully doped), another 6 Na insert into the polymer system

$$\Delta E_2 = [E(\text{cPAN-Na}) - 6 E(\text{Na}) - E(\text{cPAN-50\%Na})]/6$$

## Supplementary References

1. H. Wang, S. Kim, S. Cho, G. B, H. Choi, Mater. Resear. Bull. 2018, **97**, 49-55.
2. S. Lei, W. Cao, Z. Fu and L. Xu, J. Appl. Polym. Sci., 2016, **133**, 1–7.
3. S. Dalton, F. Heatley and P. M. Budd, Polymer., 1999, **40**, 5531–5543.
4. M. S. A. Rahaman, A. F. Ismail and A. Mustafa, Polym. Degrad. Stab., 2007, **92**, 1421–1432.
5. Y. Xue, J. Liu and J. Liang, J. Appl. Polym. Sci., 2013, **127**, 237–245.
6. W. X. Zhang, Y. Z. Wang and C. F. Sun, J. Polym. Res., 2007, **14**, 467–474.
7. Y. Park, D. S. Shin, S. H. Woo, N. S. Choi, K. H. Shin, S. M. Oh, K. T. Lee, S. Y. Hong, Adv. Mater. 2012, **24**, 3562-7.
8. A. Choi, Y. K. Kim, T. K. Kim, M.-S. Kwon, K. T. Lee, H. R. Moon, J. Mater. Chem. A 2014, **2**, 14986-14993.
9. X. Wu, J. Ma, Q. Ma, S. Xu, Y.-S. Hu, Y. Sun, H. Li, L. Chen, X. Huang, J. Mater. Chem. A 2015, **3**, 13193-13197.
10. H. Wang, P. Hu, J. Yang, G. Gong, L. Guo, X. Chen, Adv. Mater. 2015, **27**, 2348-54.
11. C. Wang, Y. Xu, Y. Fang, M. Zhou, L. Liang, S. Singh, H. Zhao, A. Schober, Y. Lei, J. Am. Chem. Soc. 2015, **137**, 3124-30.
12. T. Sun, Z. Li, H. Wang, D. Bao, F. Meng, X. Zhang, Angew. Chem. Int. Ed. 2016, **55**, 10662-10666.
13. W. Deng, J. Qian, Y. Cao, X. Ai, H. Yang, Small 2016, **12**, 583-7.
14. H. Padhy, Y. Chen, J. Lüder, S. R. Gajella, S. Manzhos, P. Balaya, Adv. Energy Mater. 2017, 1701572.
15. W. Li, M. Zhou, H. Li, K. Wang, S. Cheng, K. Jiang, Energy Environ. Sci. 2015, **8**, 2916-2921.
16. H. Hou, C. E. Banks, M. Jing, Y. Zhang, X. Ji, Adv. Mater. 2015, **27**, 7861-6.
17. L. Fan, B. Lu, Small 2016, **12**, 2783-91.
18. M. Wang, Y. Yang, Z. Yang, L. Gu, Q. Chen, Y. Yu, Adv. Sci. 2017, **4**, 1600468.
19. H. Hou, L. Shao, Y. Zhang, G. Zou, J. Chen, X. Ji, Adv. Sci. 2017, **4**, 1600243.
20. Y. Liu, L.-Z. Fan, L. Jiao, J. Mater. Chem. A 2017, **5**, 1698-1705.
